# Supplementary material for: Predictive three-biomarker panel in peripheral blood mononuclear cells for detecting hepatocellular carcinoma
Source: PubMed Central journal article supplement (PMC10980807; doi:10.1038/s41598-024-58158-9), 2024-03-29
Supplement: 41598_2024_58158_MOESM1_ESM.pdf [file 41598_2024_58158_MOESM1_ESM.pdf]

# **Predictive three-biomarker panel in peripheral blood mononuclear cells for detecting hepatocellular carcinoma**

Sara Fayazzadeh<sup>1</sup>, Mahsa Ghorbaninejad<sup>2</sup>, Amirhassan Rabbani<sup>3</sup>, Javad Zahiri<sup>1,4</sup>, Anna Meyfour<sup>2\*</sup>

1. Bioinformatics and Computational Omics Lab (BioCOOL), Department of Biophysics, Faculty of Biological Sciences, Tarbiat Modares University, Tehran, Iran
2. Basic and Molecular Epidemiology of Gastrointestinal Disorders Research Center, Research Institute for Gastroenterology and Liver Diseases, Shahid Beheshti University of Medical Sciences, Tehran, Iran
3. Department of Transplant & Hepatobiliary Surgery, Taleghani Hospital, Shahid Beheshti University of Medical Sciences, Tehran, Iran
4. Department of Neurosciences, University of California, San Diego, CA, USA

\*Corresponding author

Anna Meyfour, Research Institute for Gastroenterology and Liver Diseases, Shahid Beheshti University of Medical Sciences, Arabi Ave., Daneshjoo Blvd., Velenjak, Tehran, Iran. Postal Code: 1985717413, Tel: +98 21 22432521. Email: [a.meyfour@sbmu.ac.ir](mailto:a.meyfour@sbmu.ac.ir)

Supplementary Figure 1. PCA analysis a) before and b) after batch effect removal. Distribution of expression values in samples of GSE49515 and GSE58208 studies c) before and d) after batch effect correction.

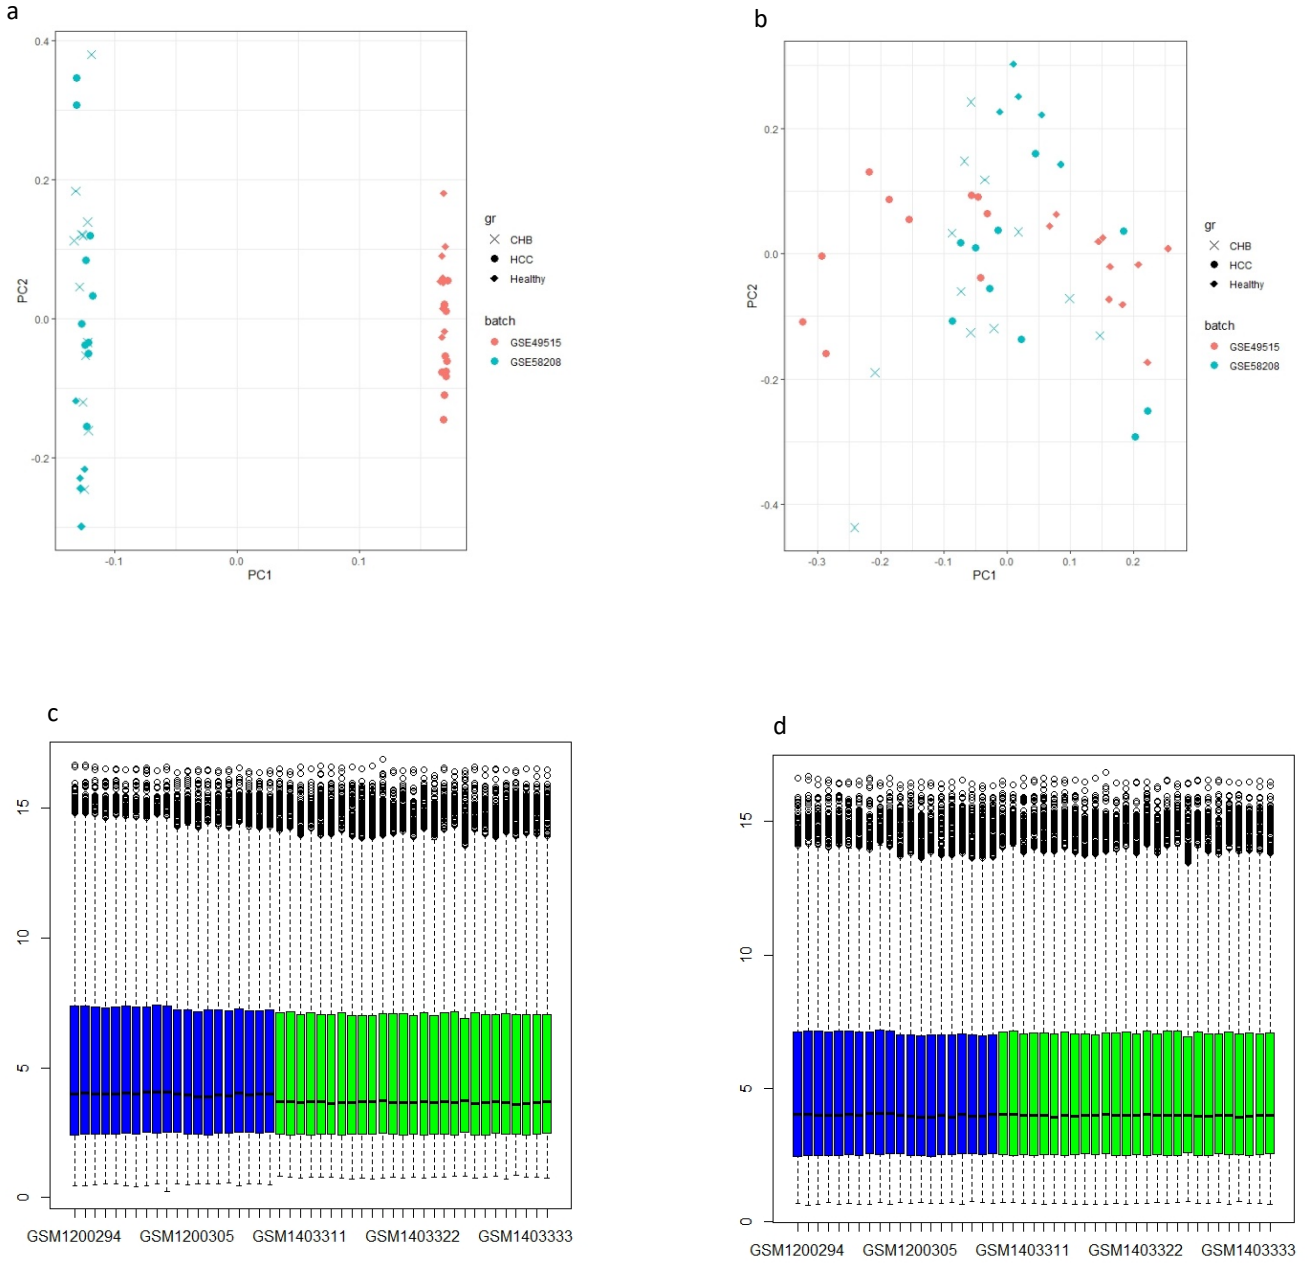

Supplementary Figure 2. Centrality parameters including betweenness, closeness, degree, eccentricity, radiality, and stress for determining hub genes a) TNF b) IL1B c) ITGA2B and d) P2RY12.

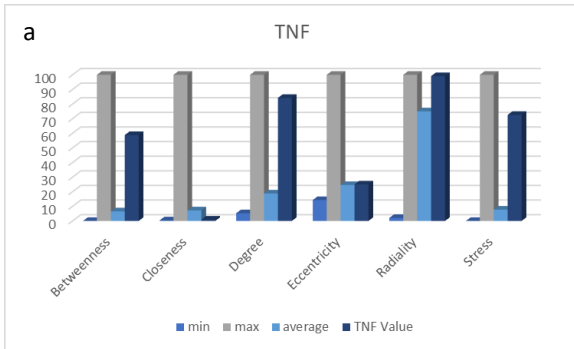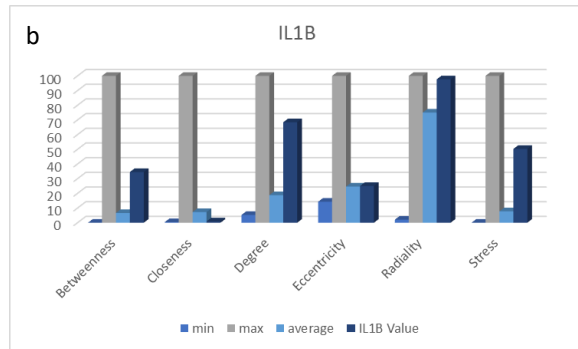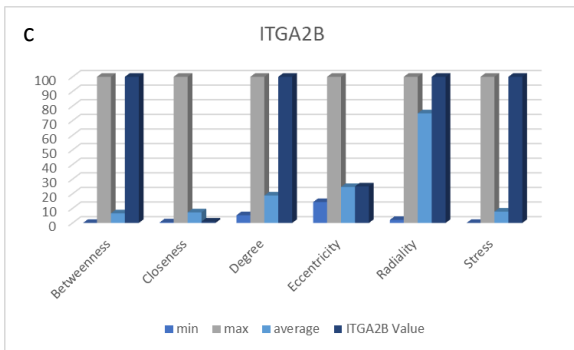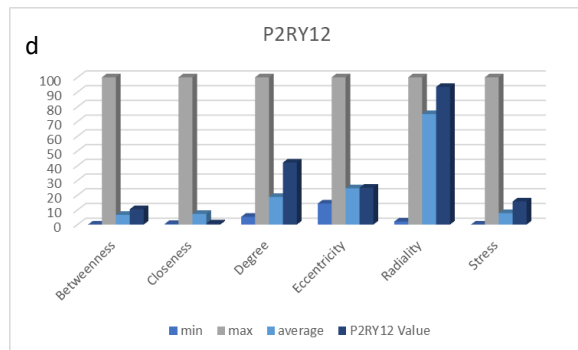

Supplementary Table 1. Accession numbers of selected datasets.

| <b>Sample Code</b> | <b>Data series</b> | <b>Group</b> |
|--------------------|--------------------|--------------|
| GSM1200294         | GSE49515           | HCC          |
| GSM1200295         | GSE49515           | HCC          |
| GSM1200296         | GSE49515           | HCC          |
| GSM1200297         | GSE49515           | HCC          |
| GSM1200298         | GSE49515           | HCC          |
| GSM1200299         | GSE49515           | HCC          |
| GSM1200300         | GSE49515           | HCC          |
| GSM1200301         | GSE49515           | HCC          |
| GSM1200302         | GSE49515           | HCC          |
| GSM1200303         | GSE49515           | HCC          |
| GSM1403309         | GSE58208           | HCC          |
| GSM1403310         | GSE58208           | HCC          |
| GSM1403311         | GSE58208           | HCC          |
| GSM1403312         | GSE58208           | HCC          |
| GSM1403313         | GSE58208           | HCC          |
| GSM1403314         | GSE58208           | HCC          |
| GSM1403315         | GSE58208           | HCC          |
| GSM1403316         | GSE58208           | HCC          |

|            |          |         |
|------------|----------|---------|
| GSM1403317 | GSE58208 | HCC     |
| GSM1403318 | GSE58208 | HCC     |
| GSM1403319 | GSE58208 | CHB     |
| GSM1403320 | GSE58209 | CHB     |
| GSM1403321 | GSE58210 | CHB     |
| GSM1403322 | GSE58211 | CHB     |
| GSM1403323 | GSE58212 | CHB     |
| GSM1403324 | GSE58213 | CHB     |
| GSM1403325 | GSE58214 | CHB     |
| GSM1403326 | GSE58215 | CHB     |
| GSM1403327 | GSE58216 | CHB     |
| GSM1403328 | GSE58217 | CHB     |
| GSM1403329 | GSE58218 | CHB     |
| GSM1403330 | GSE58219 | CHB     |
| GSM1200304 | GSE49515 | Healthy |
| GSM1200305 | GSE49515 | Healthy |
| GSM1200306 | GSE49515 | Healthy |
| GSM1200307 | GSE49515 | Healthy |
| GSM1200308 | GSE49515 | Healthy |
| GSM1200309 | GSE49515 | Healthy |

|            |          |         |
|------------|----------|---------|
| GSM1200310 | GSE49515 | Healthy |
| GSM1200311 | GSE49515 | Healthy |
| GSM1200312 | GSE49515 | Healthy |
| GSM1200313 | GSE49515 | Healthy |
| GSM1403331 | GSE58208 | Healthy |
| GSM1403332 | GSE58208 | Healthy |
| GSM1403333 | GSE58208 | Healthy |
| GSM1403334 | GSE58208 | Healthy |
| GSM1403335 | GSE58208 | Healthy |

---

Supplementary Table 2. The basic clinical characteristics of the validation cohort including HCC patients, CHB patients and healthy controls.

| Variables                                   | HCC (N=39)      | CHB (N=15)     | Healthy (N=24) |
|---------------------------------------------|-----------------|----------------|----------------|
| <b>Age(year)</b>                            | 63.9(±4.9)      | 46.66(±14.27)  | 34.57(±10.21)  |
| <b>Gender</b>                               |                 |                |                |
| Male                                        | 29(74.4%)       | 8 (53.3%)      | 16(67%)        |
| Female                                      | 10 (25.6%)      | 7(46.7%)       | 8(33%)         |
| <b>BMI</b>                                  | 25.66(±3.88)    | 25.54(±1.69)   | 25.18(±3.02)   |
| <b>Family history</b>                       |                 |                |                |
| <b>Positive</b>                             | 11(28.2%)       | -              | 2(8.3%)        |
| <b>Negative</b>                             | 28(71.8%)       |                | 22(91.7%)      |
| <b>Smoking status</b>                       |                 |                |                |
| <b>Ex-smoker</b>                            | 12(30.8%)       | 5(33.3%)       | 0(0%)          |
| <b>Smoker</b>                               | 12(30.8%)       | 5(33.3%)       | 4(16.7%)       |
| <b>Non-smoker</b>                           | 15(38.4%)       | 10(66.7%)      | 20(83.3%)      |
| <b>Drinking status</b>                      |                 |                |                |
| <b>Yes</b>                                  | 14(35.9%)       | 6(40%)         | 5(20.8%)       |
| <b>No</b>                                   | 25(64.1%)       | 9(60%)         | 19(79.2%)      |
| <b>Total Bilirubin (mg/dL)</b>              | 2.51(±1.49)     | 1.16 (±0.45)   |                |
| <b>Serum albumin (g/dL)</b>                 | 3.63(±0.81)     | 4.48(±0.71)    |                |
| <b>Aspartate transaminase (AST) (IU/L)</b>  | 58.29(±39.44)   | 31.6(±13.03)   |                |
| <b>Alanine transaminase (ALT) (IU/L)</b>    | 57.29(±54.43)   | 32(±12.91)     |                |
| <b>Alkaline phosphatase (IU/L)</b>          | 320.57(±154.33) | 207.25(±46.47) |                |
| <b>Alpha fetoprotein test (AFP) (ng/mL)</b> | 163.70(±39.77)  | 12.34(±16.37)  |                |
| <b>Platelet count (10<sup>9</sup>/L)</b>    | 128.35(±82.21)  | 161.9(±66.73)  |                |

Supplementary Table 3. Top features selected for each condition by multinomial LASSO feature selection method

| Condition               | Selected features by LASSO                                                            |
|-------------------------|---------------------------------------------------------------------------------------|
| <b>HCC</b>              | CCNA1, ANG, RNASE2, ITGA10, TNF- $\alpha$ , TTC16, C8B, IL1B, C19orf33, DDX11L2, MZB1 |
| <b>CHB</b>              | FADD, TNF- $\alpha$ , KCNJ2, AP2B1, CISH, PLAAT1, FLJ12120                            |
| <b>Healthy controls</b> | ZNF324, DNAJB2, MAP3K7, KIAA0040, MLH3                                                |

Supplementary Table 4. Performance of machine learning on the real-life patient cohort data (HCC vs healthy) using the combination of genes presented in 4-marker panel

| Panel                                         | Sensitivity | Specificity | Accuracy | AUC   |
|-----------------------------------------------|-------------|-------------|----------|-------|
| <b>RNASE2, MAP3K7, KCNJ2</b>                  | 0.932       | 0.917       | 0.921    | 0.957 |
| <b>RNASE2, TNF-<math>\alpha</math>, KCNJ2</b> | 0.949       | 1           | 0.968    | 0.972 |

|                                                |       |   |       |       |
|------------------------------------------------|-------|---|-------|-------|
| <b>TNF-<math>\alpha</math>, MAP3K7, KCNJ2</b>  | 0.949 | 1 | 0.968 | 0.998 |
| <b>RNASE2, TNF-<math>\alpha</math>, MAP3K7</b> | 0.974 | 1 | 0.984 | 1     |

Supplementary Table 5. Performance of machine learning models (3- to 5-marker panels) on the real-life HCC patient compared to CHB

| <b>Panel</b>                                                  | <b>Sensitivity</b> | <b>Specificity</b> | <b>Accuracy</b> |
|---------------------------------------------------------------|--------------------|--------------------|-----------------|
| <b>RNASE2, TNF-<math>\alpha</math>, DNAJB2</b>                | 0.932              | 0.8                | 0.889           |
| <b>RNASE2, TNF-<math>\alpha</math>, MAP3K7, KCNJ2</b>         | 0.923              | 0.867              | 0.907           |
| <b>RNASE2, TNF-<math>\alpha</math>, MAP3K7, KCNJ3, DNAJB2</b> | 0.897              | 0.867              | 0.889           |
| <b>RNASE2, TNF-<math>\alpha</math>, MAP3K7</b>                | 0.923              | 0.867              | 0.907           |

Supplementary Table 6. The oligonucleotide sequences of selected genes used in this study.

| <b>Gene name</b>               | <b>Primer sequence 5' <math>\rightarrow</math> 3'</b> | <b>Gene name</b> |
|--------------------------------|-------------------------------------------------------|------------------|
| <b>GAPDH</b>                   | F: CTCATTTCTGGTATGACAACGA<br>R: CTTCTCTTGTGCTCTTGCT   | 121              |
| <b>RANSE2</b>                  | F: CGGAGACTGGGAAACATGG<br>R: GGAGGTTTGACATGGAGTGAG    | 104              |
| <b>MAPK3K7</b>                 | F: TCCATTCCTTTGGTCTTTCCAG<br>R: AGCTCCTTCTTCCTTTGCTC  | 167              |
| <b>CCNA1</b>                   | F: AGACCTGCACTTCCTGCT<br>R: GTGCCTTATTTTCAGCTTCCCT    | 166              |
| <b>TNF-<math>\alpha</math></b> | F: CCATGTTGTAGCAAACCCT<br>R: GGACCTGGGAGTAGATGAG      | 145              |
| <b>KCNJ2</b>                   | F: AATTCTGGTTTGCTTTGGCTC<br>R: AGAGAACATGTCCTGTTGCTG  | 120              |
| <b>DNAJB2</b>                  | F: GGCATCCTACTACGAGATCC<br>R: GCTTGTGCTTGTTCAGACAG    | 182              |
